# Supplementary material for: Competition Between Phenothiazines and BH3 Peptide for the Binding Site of the Antiapoptotic BCL-2 Protein
Source: PubMed Central journal article supplement (PMC7145989; doi:10.3389/fchem.2020.00235), 2020-04-03
Supplement: Presentation_1.pdf [file Presentation_1.pdf]

## Supplementary Material

### Competition between phenothiazines and BH3 peptide for the binding site of the antiapoptotic BCL-2 protein

Aline Lagoeiro do Carmo<sup>a</sup>, Fernanda Bettanin<sup>b</sup>, Michell de Oliveira Almeida<sup>c</sup>, Simone Queiroz Pantaleão<sup>a</sup>, Tiago Rodrigues<sup>a</sup>, Paula Homem-de-Mello<sup>a,\*</sup>, Kathia Maria Honorio<sup>a,b,\*</sup>

<sup>a</sup> Centro de Ciências Naturais e Humanas, Universidade Federal do ABC, Santo André, São Paulo, Brazil.

<sup>b</sup> Escola de Artes, Ciências e Humanidades, Universidade de São Paulo (USP), São Paulo, Brazil.

<sup>c</sup> Instituto de Química de São Carlos, Universidade de São Paulo (USP), São Carlos, São Paulo, Brazil.

\*Corresponding author emails: paula.mello@ufabc.edu.br, kmhonorio@usp.br

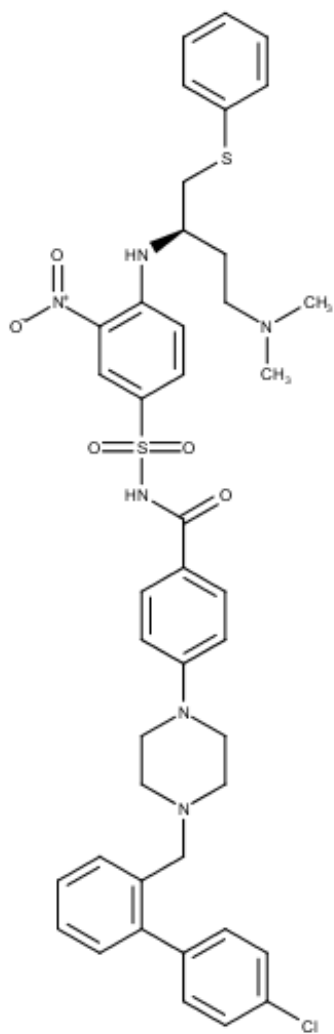

(a)

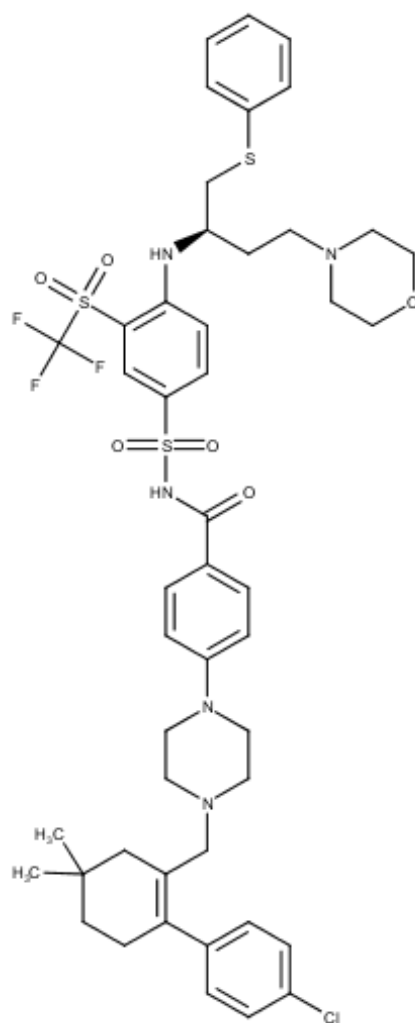

(b)

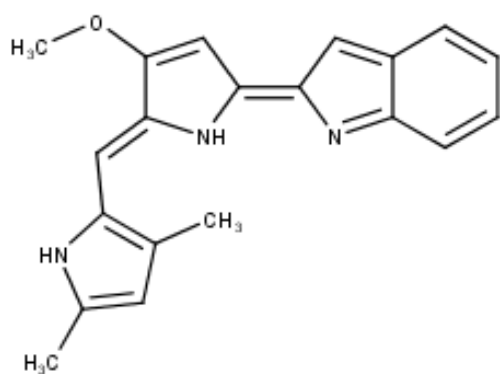

(c)

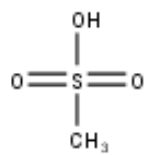

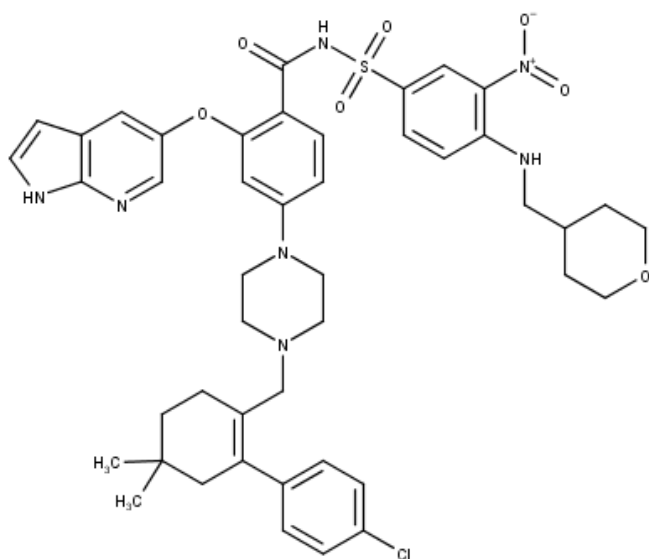

(d)

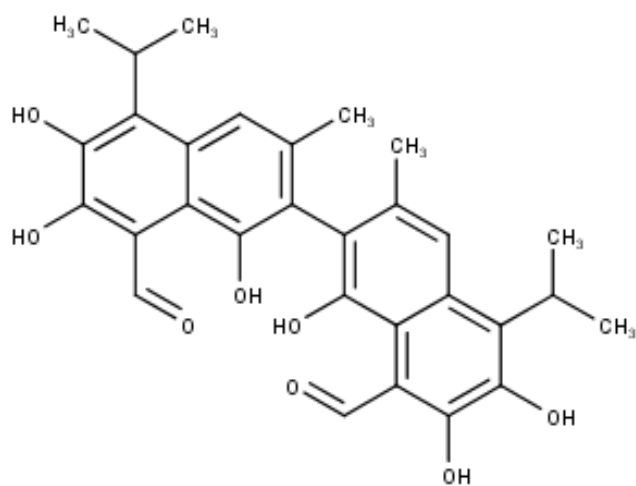

(e)

**Figure S1.** Structures of the compounds which are intended to mimic the BH3 domain that bind to the BH3 binding domain on BCL-2 antiapoptotic members: (a) ABT-737, (b) navitoclax (ABT-263), (c) obatoclax mesylate (GX15-070), (d) venetoclax (ABT-199) and (e) gossypol.

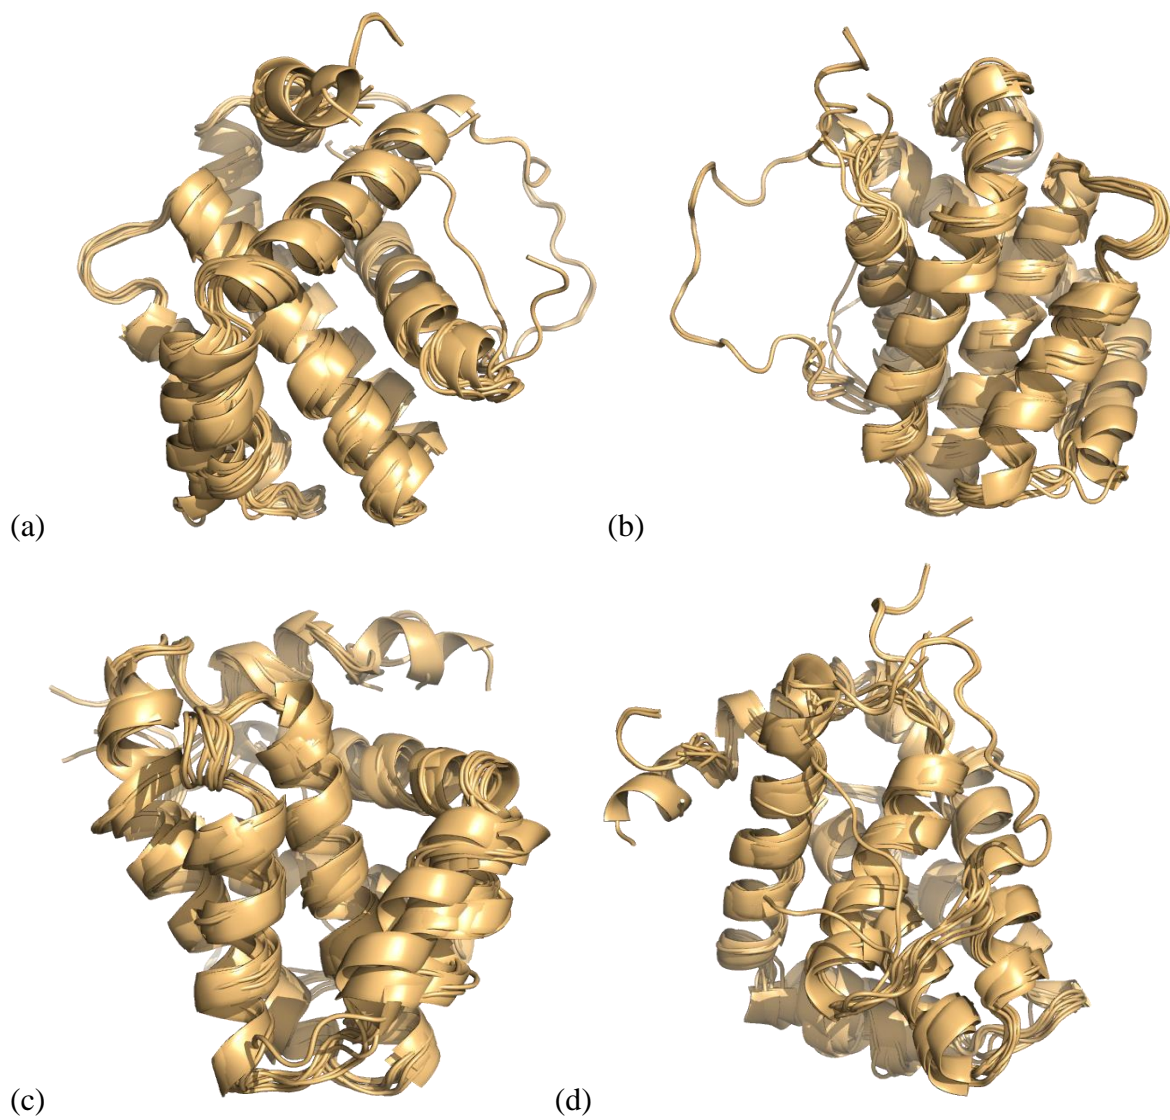

**Figure S2.** Alignment of human Bcl-2 protein A chain crystallographic structures (PDB\_ID: 1YSW, 2O2F, 2O21, 2O22, 2W3L, 4AQ3, 4IEH, 4LVT, 4LXD, 4MAN, 5AGW, 5AGX, 5JSN): (a) left side view; (b) right side view, (c) front view and (d) rear view.

|    | 1      | 2      | 3      | 4      | 5      | 6      | 7      | 8      | 9      | 10     | 11     | 12     | 13     |
|----|--------|--------|--------|--------|--------|--------|--------|--------|--------|--------|--------|--------|--------|
|    | (1YSW) | (2O2F) | (2O21) | (2O22) | (2W3L) | (4AQ3) | (4IEH) | (4LVT) | (4LXD) | (4MAN) | (5AGW) | (5AGX) | (5JSN) |
| 1  | ---    | 1.6    | 0.0    | 0.5    | 1.3    | 1.3    | 1.3    | 1.2    | 1.3    | 1.3    | 1.4    | 1.4    | 1.2    |
| 2  | 1.6    | ---    | 1.6    | 1.6    | 1.6    | 1.5    | 1.4    | 1.4    | 1.4    | 1.4    | 1.6    | 1.6    | 1.7    |
| 3  | 0.0    | 1.6    | ---    | 0.5    | 1.3    | 1.3    | 1.3    | 1.2    | 1.3    | 1.3    | 1.4    | 1.4    | 1.2    |
| 4  | 0.5    | 1.6    | 0.5    | ---    | 1.4    | 1.3    | 1.3    | 1.2    | 1.3    | 1.3    | 1.4    | 1.5    | 1.3    |
| 5  | 1.3    | 1.6    | 1.3    | 1.4    | ---    | 0.7    | 1.0    | 0.7    | 0.9    | 0.9    | 0.8    | 0.8    | 0.7    |
| 6  | 1.3    | 1.5    | 1.3    | 1.3    | 0.7    | ---    | 0.8    | 0.9    | 0.7    | 0.8    | 0.8    | 0.9    | 0.8    |
| 7  | 1.3    | 1.4    | 1.3    | 1.3    | 1.0    | 0.8    | ---    | 0.9    | 0.5    | 0.5    | 0.8    | 0.9    | 1.0    |
| 8  | 1.2    | 1.4    | 1.2    | 1.2    | 0.7    | 0.9    | 0.9    | ---    | 0.8    | 0.8    | 0.9    | 1.1    | 0.9    |
| 9  | 1.3    | 1.4    | 1.3    | 1.3    | 0.9    | 0.7    | 0.5    | 0.8    | ---    | 0.5    | 0.8    | 0.9    | 0.9    |
| 10 | 1.3    | 1.4    | 1.3    | 1.3    | 0.9    | 0.8    | 0.5    | 0.8    | 0.5    | ---    | 0.9    | 0.9    | 1.0    |
| 11 | 1.4    | 1.6    | 1.4    | 1.4    | 0.8    | 0.8    | 0.8    | 0.9    | 0.8    | 0.9    | ---    | 0.6    | 0.7    |
| 12 | 1.4    | 1.6    | 1.4    | 1.5    | 0.8    | 0.9    | 0.9    | 1.1    | 0.9    | 0.9    | 0.6    | ---    | 0.9    |
| 13 | 1.2    | 1.7    | 1.2    | 1.3    | 0.7    | 0.8    | 1.0    | 0.9    | 0.9    | 1.0    | 0.7    | 0.9    | ---    |

**Figure S3.** RMSD matrix of the alignment of the human Bcl-2 protein A chain crystallographic structures (PDB\_ID: 1YSW, 2O2F, 2O21, 2O22, 2W3L, 4AQ3, 4IEH, 4LVT, 4LXD, 4MAN, 5AGW, 5AGX, 5JSN).

|          |     |                             |                                   |                                    |                          |        |        |      |     |       |      |      |      |     |
|----------|-----|-----------------------------|-----------------------------------|------------------------------------|--------------------------|--------|--------|------|-----|-------|------|------|------|-----|
| 1ysw.pdb | 1   | -HAGRTGYDNR                 | EIVMKYIHYKLSQR                    | GYEWD--A--GDDVEENRTEAPEGTESEVVHLTL | 54                       |        |        |      |     |       |      |      |      |     |
| 2o2f.pdb | 1   | -----GYDNR                  | EIVMKYIHYKLSQR                    | GYEWD-----E-VVHLTL                 | 31                       |        |        |      |     |       |      |      |      |     |
| 2o21.pdb | 1   | -HAGRTGYDNR                 | EIVMKYIHYKLSQR                    | GYEWD--A--GDDVEENRTEAPEGTESEVVHLTL | 54                       |        |        |      |     |       |      |      |      |     |
| 2o22.pdb | 1   | -HAGRTGYDNR                 | EIVMKYIHYKLSQR                    | GYEWD--A--GDDVEENRTEAPEGTESEVVHLTL | 54                       |        |        |      |     |       |      |      |      |     |
| 2w3l.pdb | 1   | -----YDNR                   | EIVMKYIHYKLSQR                    | GYEWD-----SEVVHLTL                 | 32                       |        |        |      |     |       |      |      |      |     |
| 4aq3.pdb | 1   | -----YDNR                   | EIVMKYIHYKLSQR                    | GYEWD-----VVHLAL                   | 29                       |        |        |      |     |       |      |      |      |     |
| 4ieh.pdb | 1   | -----YDNR                   | EIVMKYIHYKLSQR                    | GYEWD-----SEVVHLTL                 | 31                       |        |        |      |     |       |      |      |      |     |
| 4lvt.pdb | 1   | -----YDNR                   | EIVMKYIHYKLSQR                    | GYEWD--A-----SEVVHLTL              | 32                       |        |        |      |     |       |      |      |      |     |
| 4lxd.pdb | 1   | R-----TG                    | YDNR                              | EIVMKYIHYKLSQR                     | GYEWDAG-----SEVVHLTL     | 36     |        |      |     |       |      |      |      |     |
| 4man.pdb | 1   | -----GYDNR                  | EIVMKYIHYKLSQR                    | GYE-----EVVHLTL                    | 29                       |        |        |      |     |       |      |      |      |     |
| 5agw.pdb | 1   | -----GYDNR                  | EIVMKYIHYKLSQR                    | GYEWD-----SEVVHLTL                 | 32                       |        |        |      |     |       |      |      |      |     |
| 5agx.pdb | 1   | -----GYDNR                  | EIVMKYIHYKLSQR                    | GYEWD--A-----SEVVHLTL              | 33                       |        |        |      |     |       |      |      |      |     |
| 5jsn.pdb | 1   | -----TG                     | YDNR                              | EIVMKYIHYKLSQR                     | GYEWD--ASPV-----PPVVHLTL | 37     |        |      |     |       |      |      |      |     |
|          |     |                             | YDNR                              | EIVMKYIHYKLSQR                     | GYE                      | VVHlTL |        |      |     |       |      |      |      |     |
| 1ysw.pdb | 55  | RQAGDDFSRRYRRDFAEMSSQLH     | ----LTPFT                         | ARGRFATVVEELFRDGVNWGRIVAFFEF       | 110                      |        |        |      |     |       |      |      |      |     |
| 2o2f.pdb | 32  | RQAGDDFSRRYRRDFAEMSSQLHLTPF | ----TARGRFATVVEELFRDGVNWGRIVAFFEF |                                    | 87                       |        |        |      |     |       |      |      |      |     |
| 2o21.pdb | 55  | RQAGDDFSRRYRRDFAEMSSQLH     | ----LTPFT                         | ARGRFATVVEELFRDGVNWGRIVAFFEF       | 110                      |        |        |      |     |       |      |      |      |     |
| 2o22.pdb | 55  | RQAGDDFSRRYRRDFAEMSSQLH     | ----LTPFT                         | ARGRFATVVEELFRDGVNWGRIVAFFEF       | 110                      |        |        |      |     |       |      |      |      |     |
| 2w3l.pdb | 33  | REAGDDFSRRYRRDFAEMSSQLH     | ----LTPFT                         | ARGRFATVVEELFRDGVNWGRIVAFFEF       | 88                       |        |        |      |     |       |      |      |      |     |
| 4aq3.pdb | 30  | RQAGDDFSRRYRRDFAEMSSQLH     | ----LTPFT                         | ARGRFATVVEELFRDGVNWGRIVAFFEF       | 85                       |        |        |      |     |       |      |      |      |     |
| 4ieh.pdb | 32  | RQAGDDFSRRYRRDFAEMSSQLH     | ----LTPFT                         | ARGRFATVVEELFRDGVNWGRIVAFFEF       | 87                       |        |        |      |     |       |      |      |      |     |
| 4lvt.pdb | 33  | RQAGDDFSRRYRRDFAEMSSQLH     | ----LTPFT                         | ARGRFATVVEELFRDGVNWGRIVAFFEF       | 88                       |        |        |      |     |       |      |      |      |     |
| 4lxd.pdb | 37  | RQAGDDFSRRYRRDFAEMSSQLH     | ----LTPFT                         | ARGRFATVVEELFRDGVNWGRIVAFFEF       | 92                       |        |        |      |     |       |      |      |      |     |
| 4man.pdb | 30  | RQAGDDFSRRYRRDFAEMSSQLH     | ----LTPFT                         | ARGRFATVVEELFRDGVNWGRIVAFFEF       | 85                       |        |        |      |     |       |      |      |      |     |
| 5agw.pdb | 33  | RQAGDDFSRRYRRDFAEMSSQLH     | ----LTPFT                         | ARGRFATVVEELFRDGVNWGRIVAFFEF       | 88                       |        |        |      |     |       |      |      |      |     |
| 5agx.pdb | 34  | RQAGDDFSRRYRRDFAEMSSQLH     | ----LTPFT                         | ARGRFATVVEELFRDGVNWGRIVAFFEF       | 89                       |        |        |      |     |       |      |      |      |     |
| 5jsn.pdb | 38  | RQAGDDFSRRYRRDFAEMSSQLH     | ----LTPFT                         | ARGRFATVVEELFRDGVNWGRIVAFFEF       | 93                       |        |        |      |     |       |      |      |      |     |
|          |     | RqAGDDFSRRYRRDFAEMSSQLH     |                                   | TARGRFATVVEELFRDGVNWGRIVAFFEF      |                          |        |        |      |     |       |      |      |      |     |
| 1ysw.pdb | 111 | GGVMCVESVNR                 | EMSP                              | LV                                 | DNIALW                   | TEYLN  | NRHLHT | WIQD | NGG | WDAFV | ELYG | PSMR | ---  | 164 |
| 2o2f.pdb | 88  | GGVMCVESVNR                 | EMSP                              | LV                                 | DNIALW                   | TEYLN  | NRHLHT | WIQD | NGG | WDAFV | ELYG | P    | ---- | 138 |
| 2o21.pdb | 111 | GGVMCVESVNR                 | EMSP                              | LV                                 | DNIALW                   | TEYLN  | NRHLHT | WIQD | NGG | WDAFV | ELYG | PSMR | ---  | 164 |
| 2o22.pdb | 111 | GGVMCVESVNR                 | EMSP                              | LV                                 | DNIALW                   | TEYLN  | NRHLHT | WIQD | NGG | WDAFV | ELYG | PSMR | --   | 164 |
| 2w3l.pdb | 89  | GGVMCVESVNR                 | EMSP                              | LV                                 | DNIALW                   | TEYLN  | NRHLHT | WIQD | NGG | WDAFV | ELYG | PSM  | ---- | 141 |
| 4aq3.pdb | 86  | GGVMCVESVNR                 | EMSP                              | LV                                 | DNIALW                   | TEYLN  | NRHLHT | WIQD | NGG | WDAFV | ELYG | P    | ---- | 135 |
| 4ieh.pdb | 88  | GGVMCVESVNR                 | EMSP                              | LV                                 | DNIALW                   | TEYLN  | NRHLHT | WIQD | NGG | WDAFV | ELYG | P    | ---- | 138 |
| 4lvt.pdb | 89  | GGVMCVESVNR                 | EMSP                              | LV                                 | DNIALW                   | TEYLN  | NRHLHT | WIQD | NGG | WDAFV | ELYG | P    | ---- | 139 |
| 4lxd.pdb | 93  | GGVMCVESVNR                 | EMSP                              | LV                                 | DNIALW                   | TEYLN  | NRHLHT | WIQD | NGG | WDAFV | ELYG | P    | ---- | 143 |
| 4man.pdb | 86  | GGVMCVESVNR                 | EMSP                              | LV                                 | DNIALW                   | TEYLN  | NRHLHT | WIQD | NGG | WDAFV | ELYG | P    | ---- | 136 |
| 5agw.pdb | 89  | GGVMCVESVNR                 | EMSP                              | LV                                 | DNIALW                   | TEYLN  | NRHLHT | WIQD | NGG | WDAFV | ELYG | P    | ---- | 139 |
| 5agx.pdb | 90  | GGVMCVESVNR                 | EMSP                              | LV                                 | DNIALW                   | TEYLN  | NRHLHT | WIQD | NGG | WDAFV | ELYG | P    | ---- | 140 |
| 5jsn.pdb | 94  | GGVMCVESVNR                 | EMSP                              | LV                                 | DNIALW                   | TEYLN  | NRHLHT | WIQD | NGG | WDAFV | ELYG | PSMR | LE   | 149 |
|          |     | GGVMCVESVNR                 | EMSP                              | LV                                 | DNIALW                   | TEYLN  | NRHLHT | WIQD | NGG | WDAFV | ELYG |      |      |     |

**Figure S4.** Alignment of A-chain crystallographic structures of human Bcl-2 protein (PDB\_ID: 1YSW, 2O2F, 2O21, 2O22, 2W3L, 4AQ3, 4IEH, 4LVT, 4LXD, 4MAN, 5AGW, 5AGX, 5JSN), representing hydrophobic residues including aromatics (red), acids (blue), basic (pink) and basic with hydroxyl groups and / or amino groups (green); with the marking line below each stretch of the multiple alignment indicating fully conserved residues (upper case) and partially conserved residues (lower case).

**Table S1.** Characteristics of probes used by FTSite and FTMap servers

| <b>Probe</b>                | <b>Properties<sup>a</sup></b>                        |
|-----------------------------|------------------------------------------------------|
| Acetamide (ACD)             | Polar, hydrogen bond acceptor and donor              |
| Acetonitrile (ACN)          | Polar and hydrogen bond acceptor character           |
| Acetone (ACT)               | Polar and hydrogen bond acceptor character           |
| Acetaldehyde (ADY)          | Polar and hydrogen bond acceptor character           |
| Methylamine (AMN)           | Polar, hydrogen bond acceptor and donor              |
| Benzaldehyde (BDY)          | Polar, aromatic and hydrogen bond acceptor character |
| Benzene (BEN)               | Hydrophobic and aromatic                             |
| Butanol (BUT)               | Polar and hydrogen bond acceptor character           |
| Ciclohexane (CHX)           | Polar, hydrogen bond acceptor and donor              |
| N,N-dimethylformamide (DFO) | Polar and hydrogen bond acceptor character           |
| Dimethyl ether (DME)        | Polar and hydrogen bond acceptor character           |
| Ethanol (EOL)               | Polar, hydrogen bond acceptor and donor              |
| Ethane (ETH)                | Hydrophobic                                          |
| Phenol (PHN)                | Polar, aromatic, hydrogen bond acceptor and donor    |
| Isopropanol (THS)           | Polar and hydrogen bond acceptor character           |
| Urea (URE)                  | Polar, hydrogen bond acceptor and donor              |

(a) (Bohnuud et al. 2012; Brenke et al. 2009; D. Kozakov et al. 2011; Dima Kozakov et al. 2015; Ngan et al. 2012)

**Table S2.** Hydrophobicity and hydrophilicity values by Kyte and Doolittle

| <b>Residues</b> | <b>Kyte-Doolittle Values <sup>a</sup></b> | <b>Classifications</b> | <b>Color Scale <sup>c</sup></b> |
|-----------------|-------------------------------------------|------------------------|---------------------------------|
| Ile             | 4.5                                       | Hydrophobic            | Orange-red                      |
| Val             | 4.2                                       | Hydrophobic            | Orange-red                      |
| Leu             | 3.8                                       | Hydrophobic            | Orange-red                      |
| Phe             | 2.8                                       | Hydrophobic            | Orange-red                      |
| Cys             | 2.5                                       | Hydrophobic            | Orange-red                      |
| Met             | 1.9                                       | Hydrophobic            | Orange-red                      |
| Ala             | 1.8                                       | Hydrophobic            | Orange-red                      |
| Gly             | -0.4                                      | Neutral                | White                           |
| Thr             | -0.7                                      | Neutral                | White                           |
| Ser             | -0.8                                      | Neutral                | White                           |
| Trp             | -0.9                                      | Neutral                | White                           |
| Tyr             | -1.3                                      | Neutral                | White                           |
| Pro             | -1.6                                      | Neutral                | White                           |
| His             | -3.2                                      | Hydrophilic            | Blue                            |
| Glu             | -3.5                                      | Hydrophilic            | Blue                            |
| Gln             | -3.5                                      | Hydrophilic            | Blue                            |
| Asp             | -3.5                                      | Hydrophilic            | Blue                            |
| Asn             | -3.5                                      | Hydrophilic            | Blue                            |
| Lys             | -3.9                                      | Hydrophilic            | Blue                            |
| Arg             | -4.5                                      | Hydrophilic            | Blue                            |

(a) Kyte and Doolittle, 1982.

(b) De Oliveira Rodrigues et al., 2015.

(c) Pettersen et al., 2004.



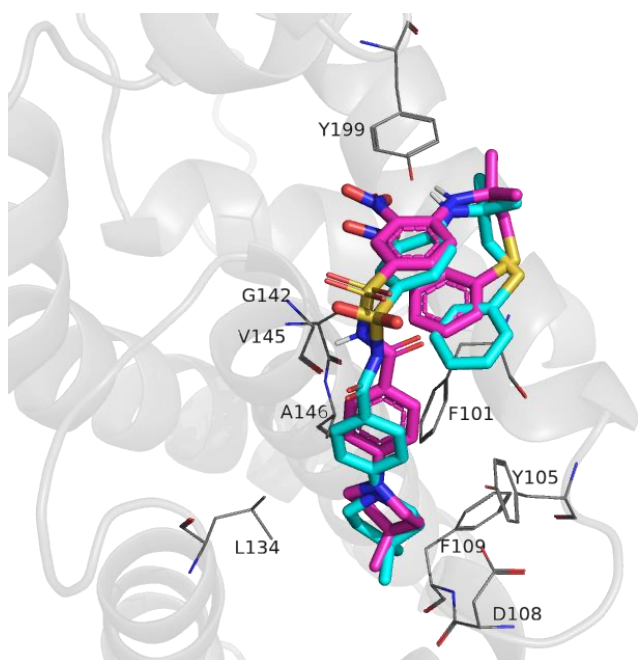

**Figure S5.** Representation of the molecular coupling of the ligand at the original position of the protein-ligand complex crystal structure (light pink) (PDB\_ID: 2O22) and ligand overlap (Blue).

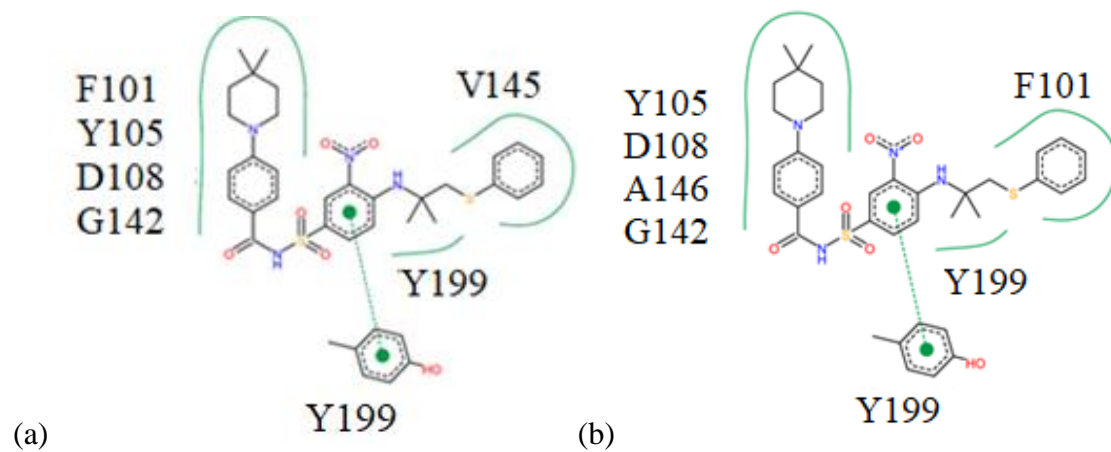

**Figure S6.** Interactions Predicted by the Poseview Server. (a) crystallographic ligand pose (PDB\_ID: 2O22) and (b) ligand pose obtained from re-coupling.

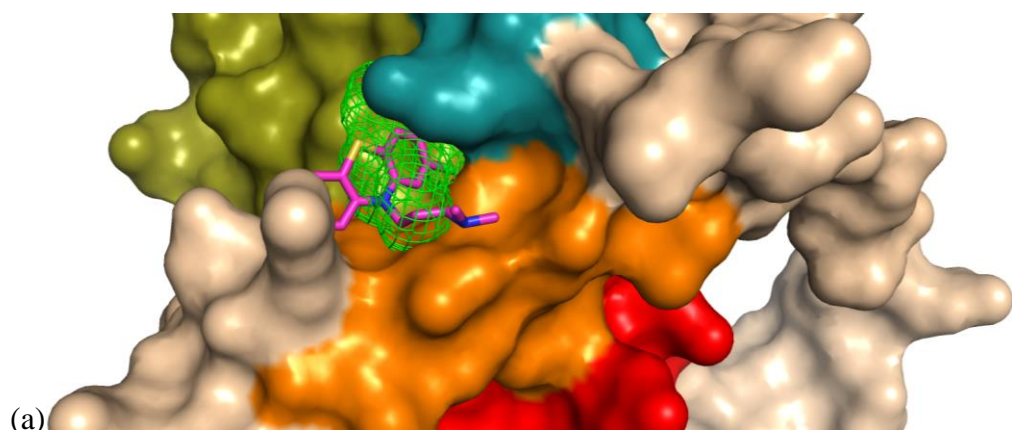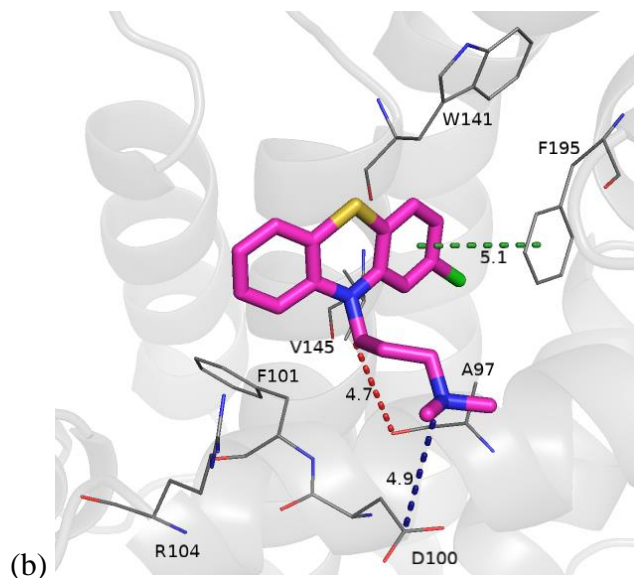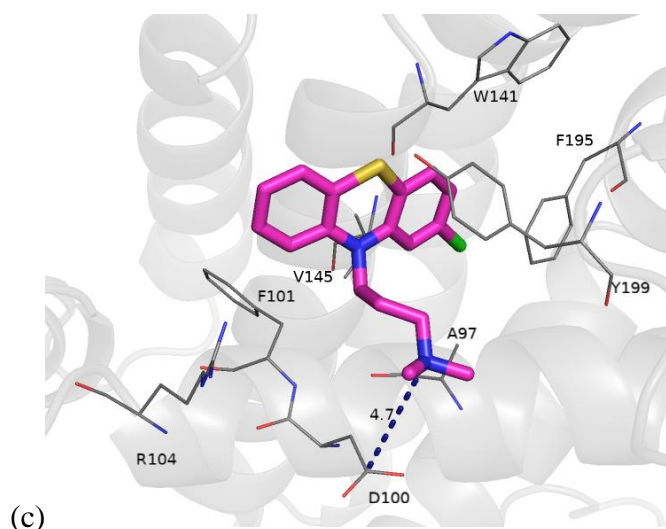

**Figure S7.** (a) Representation of BH1-BH4 domains (Figure 2) with presence of site 2 detected by FTSite server with aliphatic chlorpromazine subclass molecular coupling, ( $EC_{50} = (125.3 \pm 1.1) \mu\text{mol.L}^{-1}$ ) performed on the AutoDock Vina 1.5.7 program. Representation of the  $\pi$ -stacking (green), hydrogen bonding (red) and saline bridge (Blue) interaction of the molecular couplings performed in AutoDock Vina 1.5.7 (b) and Achilles Blind Docking (c) server, with additional interactions and / or confirmed by the BINANA 1.2.0 algorithm.

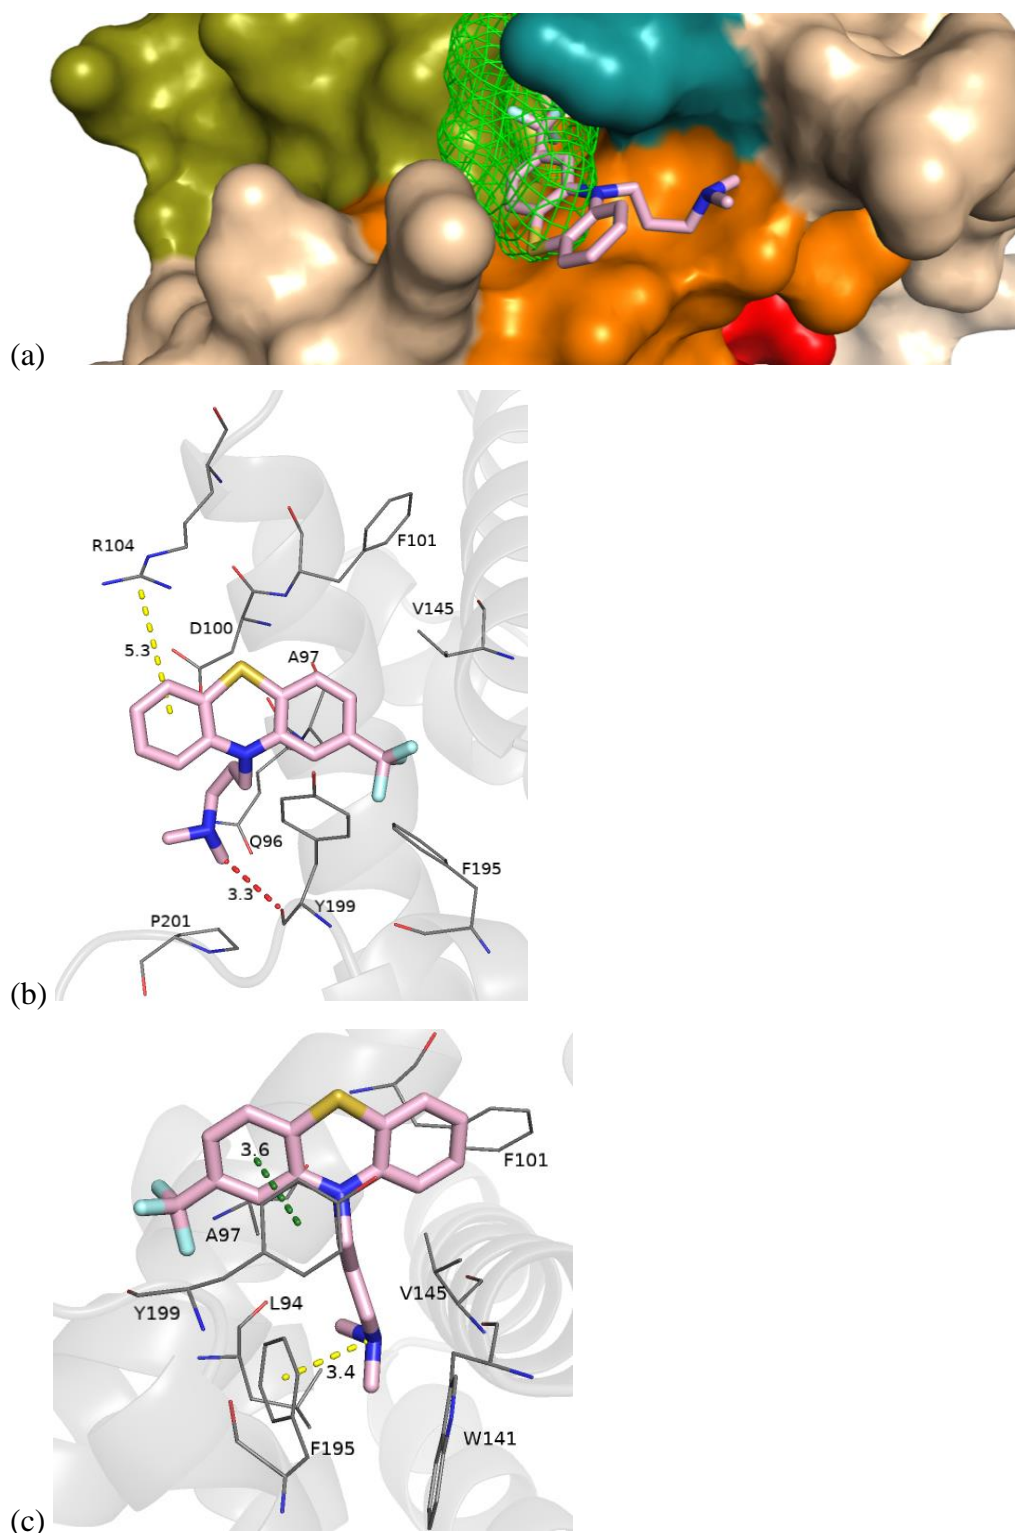

**Figure S8.** (a) Representation of BH1-BH4 domains (Figure 2) with the presence of site 2 detected by the FTSite server with the aliphatic subclass triflupromazine molecular coupling ( $EC_{50} = (105.9 \pm 1.0) \mu\text{mol}\cdot\text{L}^{-1}$ ) performed in the AutoDock Vina 1.5.7 program. Representation of  $\pi$ -stacking (green), cation- $\pi$  (yellow) and hydrogen bonding (red) interactions of the molecular couplings performed in AutoDock Vina 1.5.7 (b) and Achilles Blind Docking (c) server, with interactions additional and / or confirmed by the BINANA 1.2.0 algorithm.

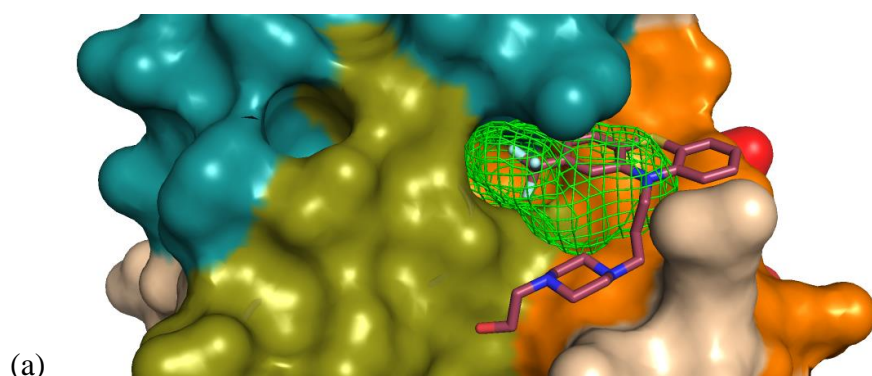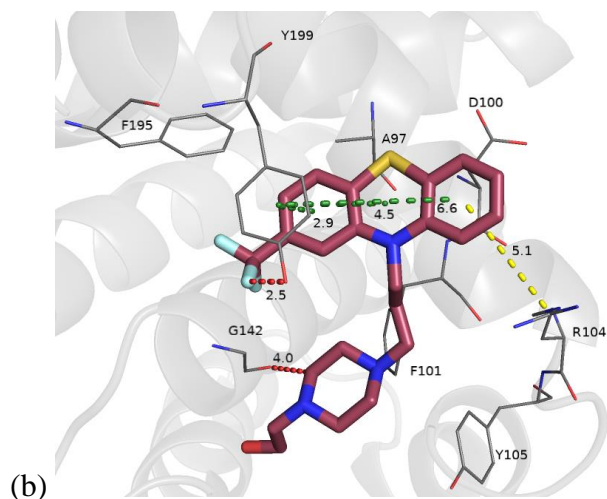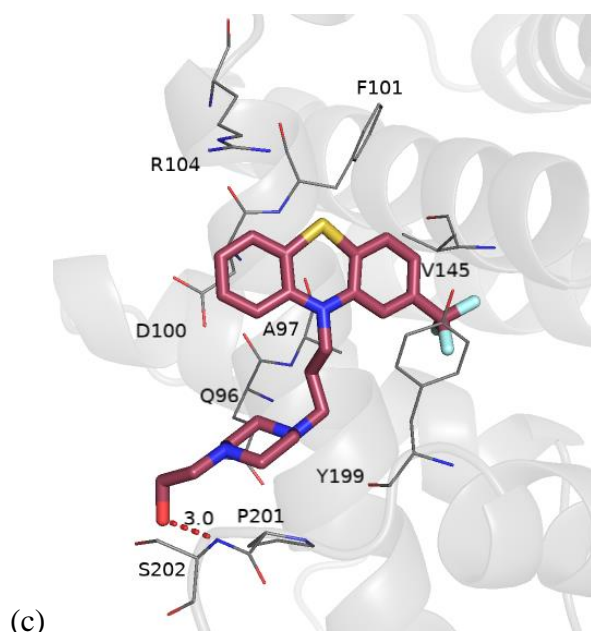

**Figure S9.** (a) Representation of BH1-BH4 domains (Figure 2) with presence of site 2 detected by FTSite server with piperazine subclass molecular coupling of fluphenazine ( $EC_{50} = (63.2 \pm 1.0) \mu\text{mol.L}^{-1}$ ) performed in the AutoDock Vina 1.5.7 program. Representation of  $\pi$ -stacking (green), cation- $\pi$  (yellow) and hydrogen bonding (red) interactions of the molecular couplings performed in AutoDock Vina 1.5.7 (b) and Achilles Blind Docking (c) server, with interactions additional and / or confirmed by the BINANA 1.2.0 algorithm.



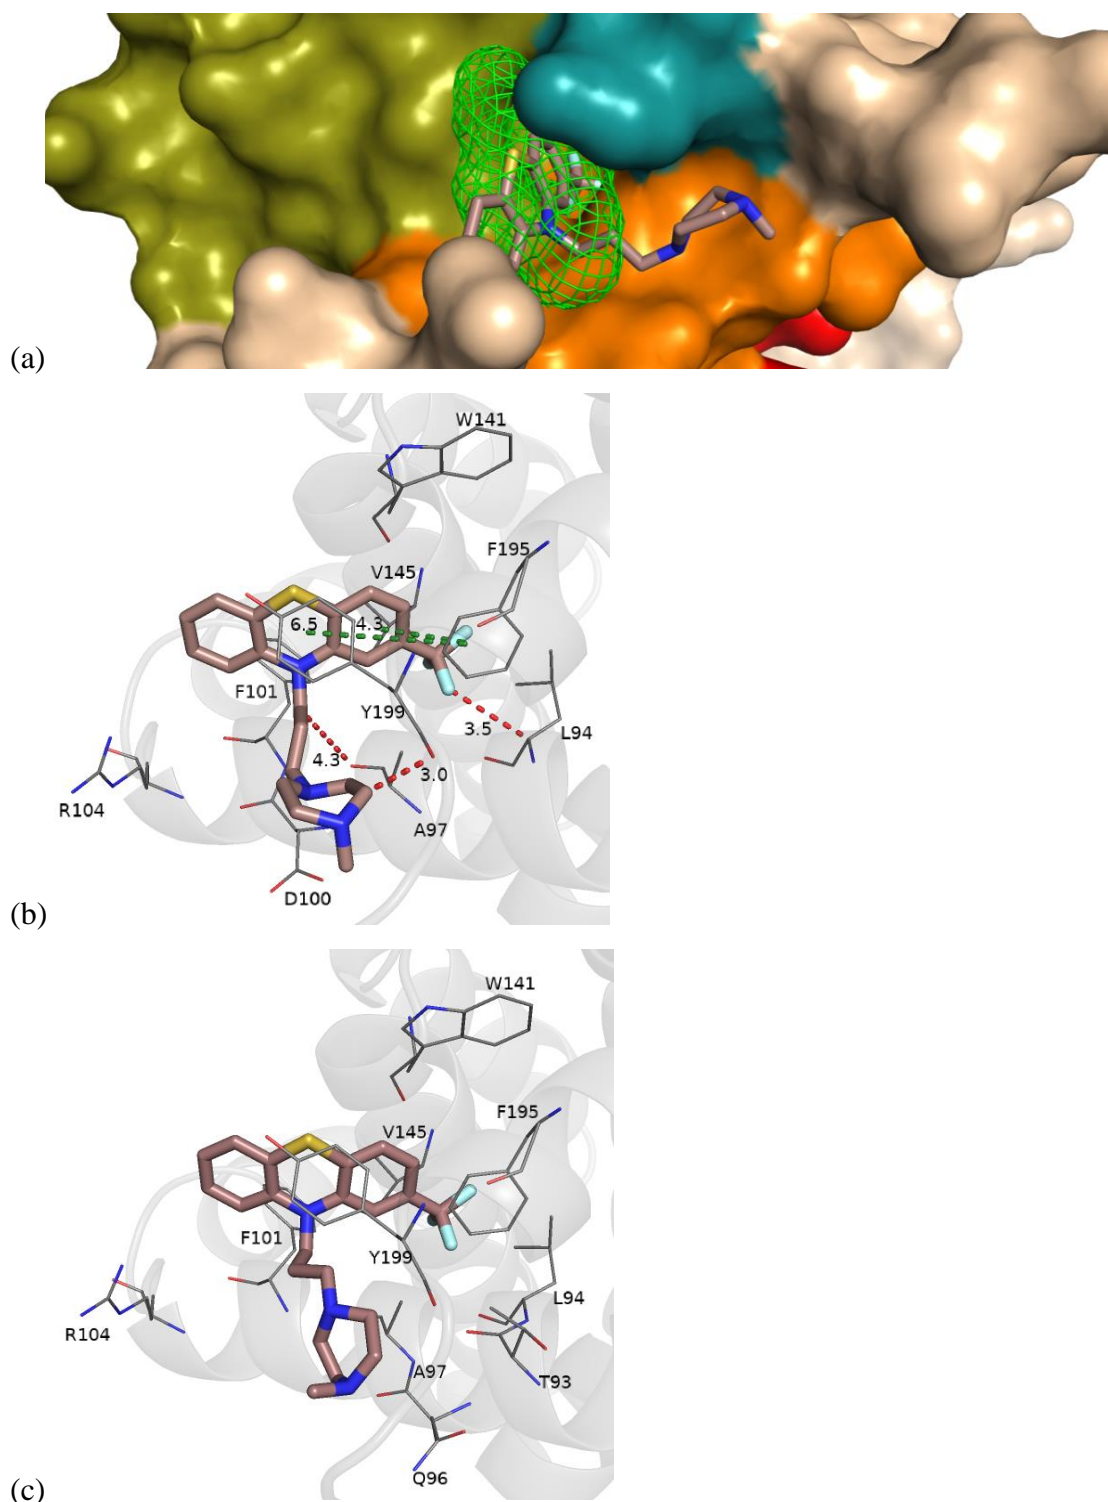

**Figure S10.** (a) Representation of BH1-BH4 domains (Figure 2) with the presence of site 2 detected by the FTSite server with the piperazine subclass trifluoperazine molecular coupling ( $EC_{50} = (56.2 \pm 1.0) \mu\text{mol.L}^{-1}$ ) performed in the AutoDock Vina 1.5.7 program. Representation of the  $\pi$ -stacking (green), hydrogen bonding (red) and saline bridge (Blue) interaction of the molecular couplings performed in AutoDock Vina 1.5.7 (b) and Achilles Blind Docking (c) server, with additional interactions and / or confirmed by the BINANA 1.2.0 algorithm.

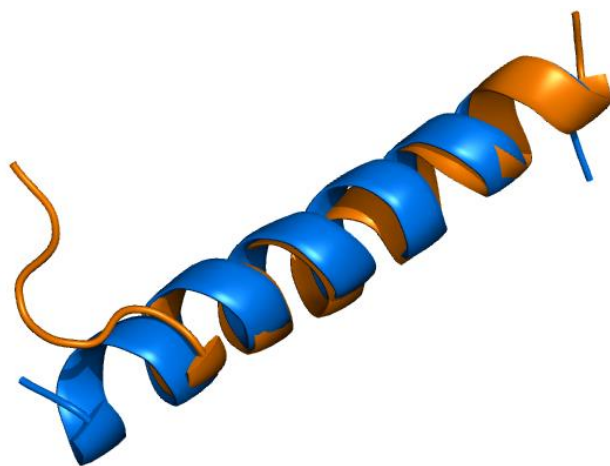

**Figure S11.** Representation of the molecular coupling of peptide BH3 in the original position of the crystalline structure (blue) (PDB\_ID: 2XA0) in relation to the composition used by the coupling (orange) with the GalaxyPepDock server (RMSD 1.962 Å between the alpha helix amino acid residues).

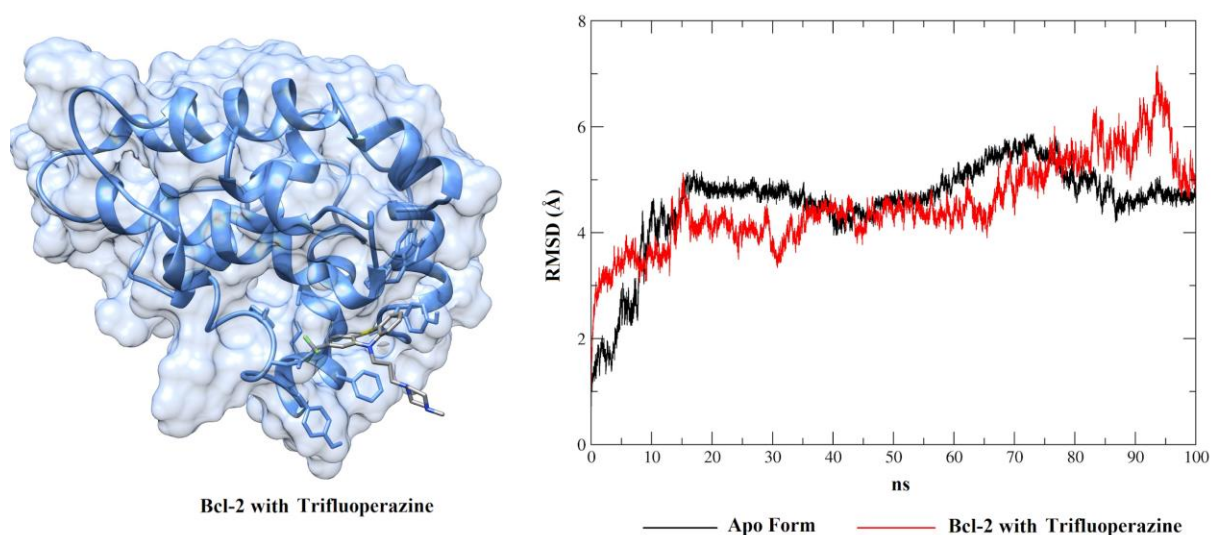

**Figure S12.** RMSD values of BCL-2 in Apo form (black), BCL-2 with trifluoperazine molecule (red) and 3D conformation obtained by clustering the MD.

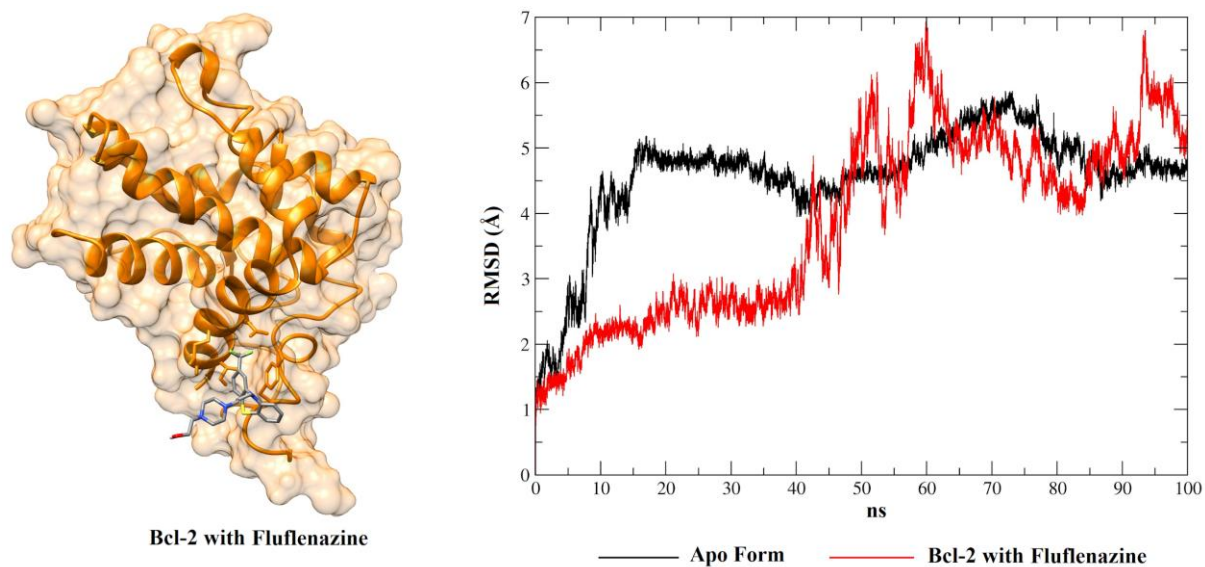

**Figure S13.** RMSD values of BCL-2 in Apo form (black), BCL-2 with fluphenazine molecule (red) and 3D conformation obtained by clustering the MD.

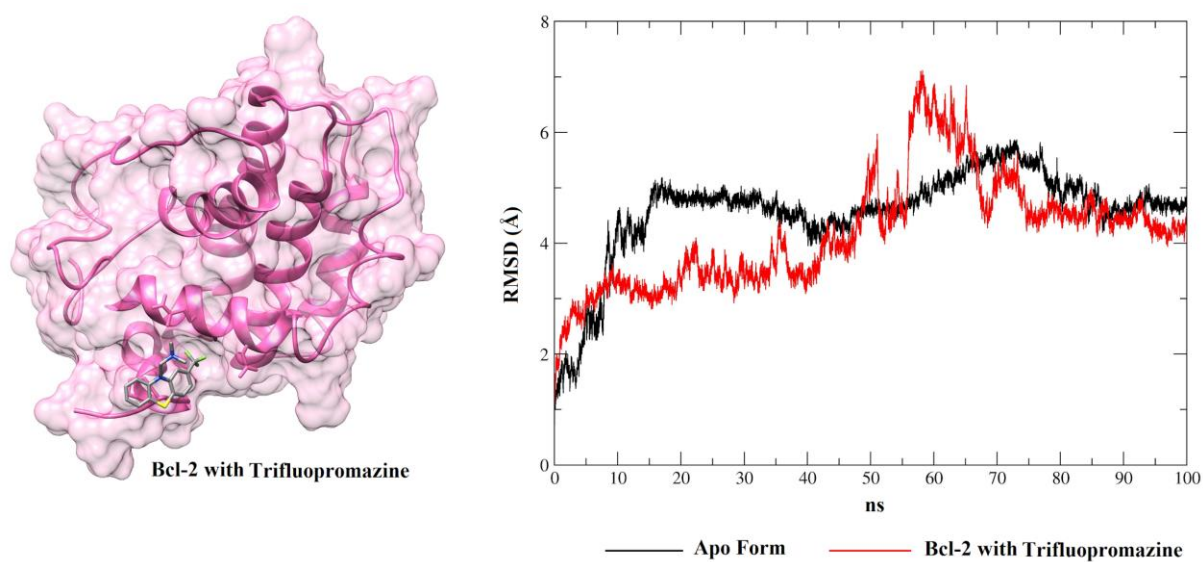

**Figure S14.** RMSD values of BCL-2 in Apo form (black), BCL-2 with trifluopromazine molecule (red) and 3D conformation obtained by clustering the MD.

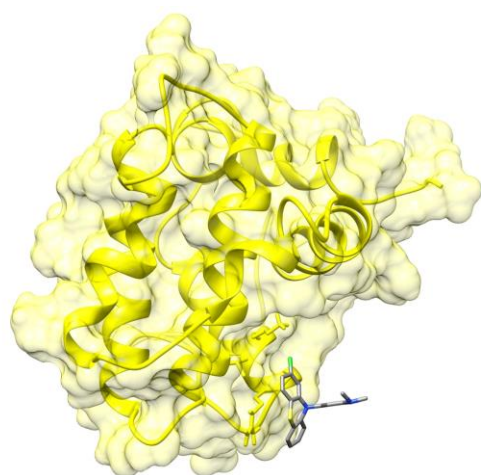

Bcl-2 with Chlorpromazine

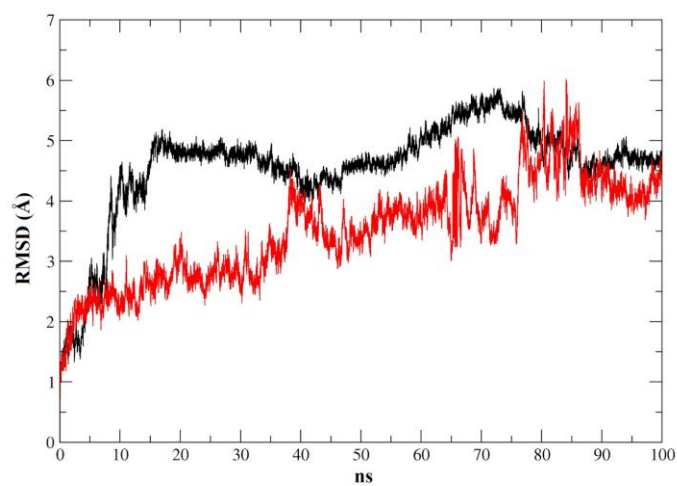

— Apo Form — Bcl-2 with Chlorpromazine

**Figure S15.** RMSD values of BCL-2 in Apo form (black), BCL-2 with chlorpromazine molecule (red) and 3D conformation obtained by clustering the MD.

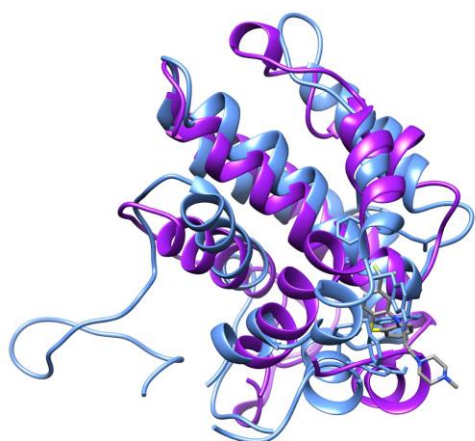

— Apo Form — Bcl-2 with Trifluoperazine

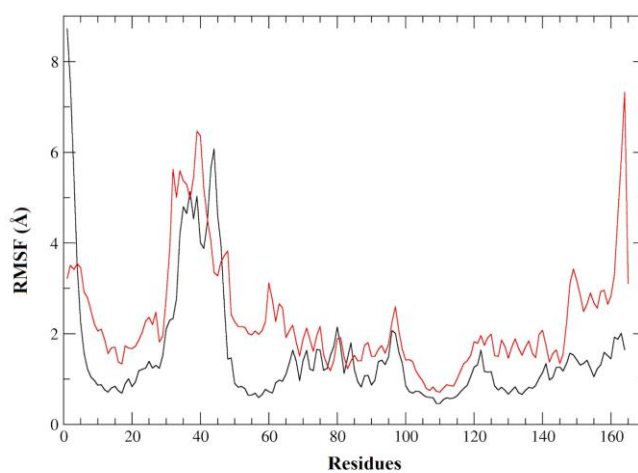

— Apo Form — Bcl-2 with Trifluoperazine

**Figure S16.** RMSF values of BCL-2 in the presence of trifluoperazine.



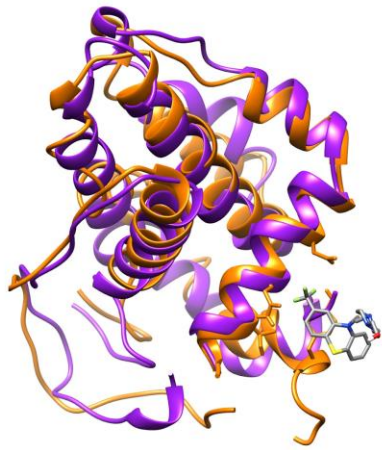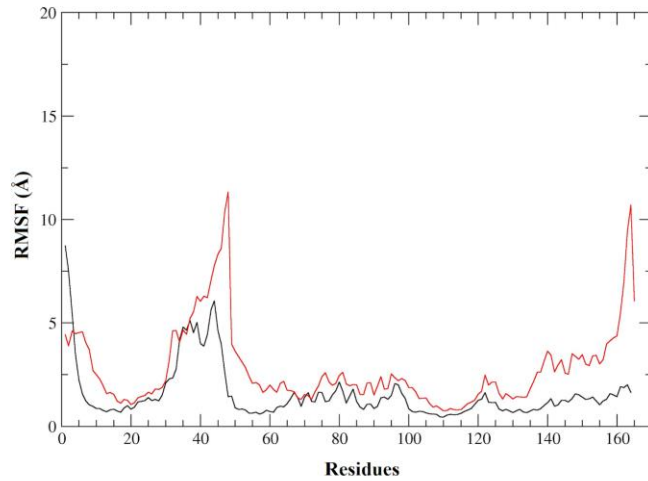

— Apo Form — Bcl-2 with Flufenazine

— Apo Form — Bcl-2 with Flufenazine

**Figure S17.** RMSF values of BCL-2 in the presence of fluphenazine.

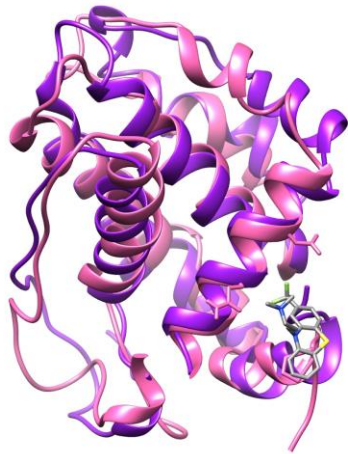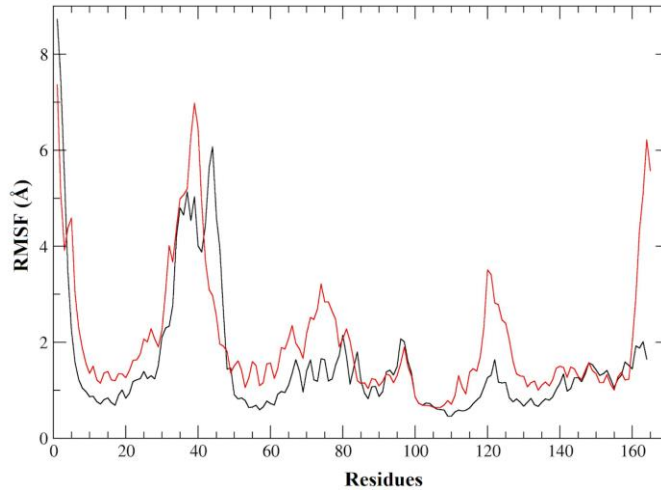

— Apo Form — Bcl-2 with Trifluopromazine

— Apo Form — Bcl-2 with Trifluopromazine

**Figure S18.** RMSF values of BCL-2 in the presence of trifluopromazine.

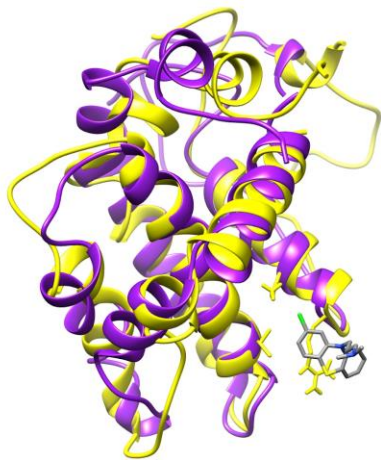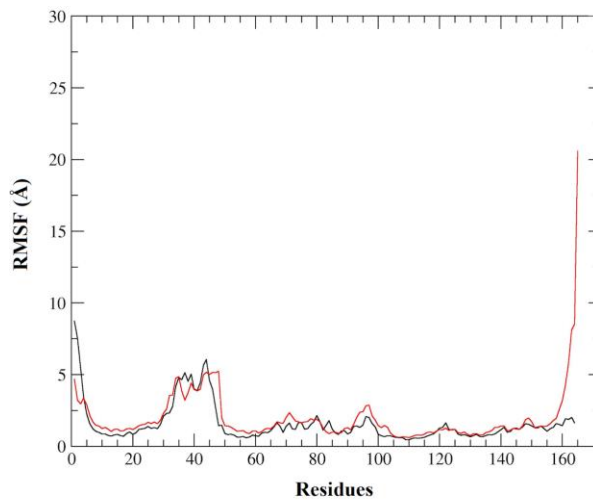

— Apo Form — Bcl-2 with Chlorpromazine

— Apo Form — Bcl-2 with Chlorpromazine

**Figure S19.** RMSF values of BCL-2 in the presence of chlorpromazine.

## REFERENCES

- Bohnuud, Tanggis et al. 2012. "Computational Mapping Reveals Dramatic Effect of Hoogsteen Breathing on Duplex DNA Reactivity with Formaldehyde." *Nucleic Acids Research* 40(16): 7644–52. <https://academic.oup.com/nar/article/40/16/7644/1032290>.
- Brenke, Ryan et al. 2009. "Fragment-Based Identification of Druggable 'Hot Spots' of Proteins Using Fourier Domain Correlation Techniques." *Bioinformatics* 25(5): 621–27. <https://academic.oup.com/bioinformatics/article-lookup/doi/10.1093/bioinformatics/btp036>.
- Kozakov, D. et al. 2011. "Structural Conservation of Druggable Hot Spots in Protein-Protein Interfaces." *Proceedings of the National Academy of Sciences* 108(33): 13528–33. <http://www.pnas.org/cgi/doi/10.1073/pnas.1101835108>.
- Kozakov, Dima et al. 2015. "The FTMap Family of Web Servers for Determining and Characterizing Ligand-Binding Hot Spots of Proteins." *Nature Protocols* 10(5): 733–55. <http://www.nature.com/articles/nprot.2015.043>.
- Kyte, Jack, and Russell F. Doolittle. 1982. "A Simple Method for Displaying the Hydrophobic Character of a Protein." *Journal of Molecular Biology* 157(1): 105–32. <https://linkinghub.elsevier.com/retrieve/pii/0022283682905150>.
- Ngan, Chi-Ho et al. 2012. "FTSite: High Accuracy Detection of Ligand Binding Sites on Unbound Protein Structures." *Bioinformatics* 28(2): 286–87. <https://academic.oup.com/bioinformatics/article-lookup/doi/10.1093/bioinformatics/btr651>.
- De Oliveira Rodrigues, Thiago Assis, Larissa Fernandes Leijôto, Poliane C. Oliveira Brandão, and Cristiane Neri Nobre. 2015. "Predição de Função de Proteínas Através Da Extração de Características Físico-Químicas." *Revista de Informática Teórica e Aplicada* 22(1): 29. <http://seer.ufg.br/index.php/rita/article/view/RITA-VOL22-NR1-29>.
- Pettersen, Eric F. et al. 2004. "UCSF Chimera?A Visualization System for Exploratory Research and Analysis." *Journal of Computational Chemistry* 25(13): 1605–12. <http://doi.wiley.com/10.1002/jcc.20084>.
